# Supplementary material for: Lewy pathology of the esophagus correlates with the progression of Lewy body disease: a Japanese cohort study of autopsy cases
Source: Springer Nature journal article supplement (doi:10.1007/s00401-020-02233-8), 2020-11-05
Supplement: MOESM1 [file 18558174]

**Lewy pathology of the esophagus correlates with the progression of Lewy body disease: a Japanese cohort study of autopsy cases**

Zen-ichi Tanei<sup>1,2</sup>, Yuko Saito<sup>1</sup>, Shinji Ito<sup>3</sup>, Tomoyasu Matsubara<sup>1,4</sup>, Atsuko Motoda<sup>1,4</sup>, Mikihiro Yamazaki<sup>1,5</sup>, Yasuhiro Sakashita<sup>1,6</sup>, Ito Kawakami<sup>1,7</sup>, Masako Ikemura<sup>8</sup>, Shinya Tanaka<sup>2,9</sup>, Renpei Sengoku<sup>1,5</sup>, Tomio Arai<sup>10</sup>, Shigeo Murayama<sup>1,11</sup>

<sup>1</sup>Department of Neurology and Neuropathology (the Brain Bank for Aging Research), Tokyo Metropolitan Geriatric Hospital and Institute of Gerontology, Tokyo, Japan

<sup>2</sup>Department of Cancer Pathology, Faculty of Medicine, Hokkaido University, Sapporo, Japan

<sup>3</sup>Department of Pathology, Toranomon Hospital, Tokyo, Japan

<sup>4</sup>Department of Clinical Neuroscience & Therapeutics, Hiroshima University Graduate School of Biomedical and Health Sciences, Hiroshima, Japan

<sup>5</sup>Department of Neurology, The Jikei University School of Medicine, Tokyo, Japan

<sup>6</sup>Department of Neurology and Neurobiology of Aging, Kanazawa University Graduate School of Medical Sciences, Kanazawa, Japan

<sup>7</sup>Dementia Research Project, Tokyo Metropolitan Institute of Medical Science, Tokyo, Japan

<sup>8</sup>Department of Pathology, Graduate School of Medicine, The University of Tokyo, Tokyo, Japan.

<sup>9</sup>Institute for Chemical Reaction Design and Discovery (WPI-ICReDD), Hokkaido University, Sapporo, Japan

<sup>10</sup>Department of Pathology, Tokyo Metropolitan Geriatric Hospital and Institute of Gerontology, Tokyo, Japan

<sup>11</sup>Brain Bank for Neurodevelopmental, Neurological and Psychiatric Disorders, United Graduate School of Child Development, Osaka University, Osaka, Japan

**Correspondence:**

Shigeo Murayama, M.D., Ph.D.

Department of Neurology and Neuropathology (the Brain Bank for Aging Research)

Tokyo Metropolitan Geriatric Hospital and Institute of Gerontology

35-2 Sakae-cho, Itabashi-ku, Tokyo 173-0015, Japan.

Tel: +81-3-3964-1141; Fax: +81-3-3579-4776; E-mail: smurayam@bbarjp.net

### Supplementary materials

**Supplementary Figure 1** Immunohistochemistry using four different anti- $\alpha$ -synuclein antibodies. (a) LB in Auerbach's plexus of the esophagus. (b–e) Immunoreactivity of LB and neuronal processes observed in four anti- $\alpha$ -synuclein antibodies. H&E (a), pSyn#64 (b), MJF-R13 (c), LB509 (d), and Pser129 (e). Scale bar = 100  $\mu$ m.

**Supplementary Figure 2** Cause of death for the 518 BBAR cases at autopsy. Three-fourths of the individuals died of respiratory diseases, malignant neoplasm, or cardiovascular disease. Dotted areas in the inner circle show comorbidity with neurodegenerative diseases, such as AD, PD, PDD, DLB, argyrophilic grain disease, neurofibrillary tangle predominant dementia, frontotemporal lobar degeneration, progressive supranuclear palsy, or others.

**Supplementary Figure 3** List of the 178 BBAR cases who showed Lewy pathology in their nervous systems. Semi-quantitative analyses of the  $\alpha$ -synuclein deposition are colored in blue gradation (score 0–4 according to DLB Consensus guidelines). *AA*, amyloid angiopathy; *AAD*, acute aortic dissection; *AAneu*, aortic aneurysm; *AD*, Alzheimer's disease; *Adr*, adrenal gland; *AF*, autonomic failure; *Af*, atrial fibrillation; *AGD*, argyrophilic grain disease; *ALS*, amyotrophic lateral sclerosis; *AMI*, acute myocardial infarction; *AML*, acute myeloid leukemia; *Amy*, amygdala; *AON*, anterior olfactory nucleus; *AS*, aortic valve stenosis; *BBAR LB*, Lewy body stage of the Brain Bank for Aging Research; *BT*, brain tumor; *Braak LB*, Braak Lewy body stage; *BH*, brain hemorrhage; *BI*, brain infarction; *BW*, brain weight (g); CERAD, 0 = none, A = sparse, B = moded, C = frequent; *ca*, cancer; *CBS*, corticobasal syndrome; *CHF*, congestive heart failure; *Cing*, anterior cingulate gyrus; *CML*, chronic myeloid leukemia; *COPD*, chronic obstructive pulmonary disease; *CRF*, chronic renal failure; *CVD*, cerebrovascular disease; *DLB*, dementia with Lewy bodies; *DM*, diabetes mellitus; *DMNV*, dorsal motor nucleus of the vagus; *DLB 4th*, fourth consensus report of the DLB consortium; *DLBN*, dementia with Lewy bodies, neocortical form; *DLBT*, dementia with Lewy bodies, transitional form; *DNTC*, diffuse neurofibrillary tangles with calcification; *Eso*, esophagus; *Esophagus M*, mucosa of the esophagus; *Esophagus MM*, muscularis mucosa; *Esophagus SM*, submucosa; *Esophagus MP*, muscularis propria; *Esophagus ADV*, adventitia; *F*, frontal lobe; *FTLD*, frontotemporal lobar degeneration; *GI bleed*, gastrointestinal bleeding; *Grain*, Saito grain stage; *HCM*, hypertrophic cardiomyopathy; *He*, heart; *HY*, Hoehn and Yahr scale; *IE*, infective endocarditis; *IHC*, immunohistochemistry, ✓ = performed; *IHD*, ischemic heart disease; *Int Perf*, intestinal perforation; *IPneu*, interstitial pneumonia; *IVL*, intravascular lymphoma; *LBD*, Lewy body disease; *LC*, locus coeruleus; *M*, medullar oblongata; *MDD*, major depressive disorder; *MDS*, myelodysplastic syndrome; *ML*, malignant lymphoma; *MM*, multiple myeloma; *MPA*, microscopic polyangiitis; *NA*, not available; *nbM*, nucleus basalis of Meynert; *NFT*, Braak neurofibrillary tangle stage; *NFTD*, neurofibrillary tangle predominant dementia; *NPD*, neuropathological diagnosis; *OB*, olfactory bulb; *P*, parietal lobe; *PA*,

Parkinsonism. 1 = presence, 0 = absence; *PAF*, pure autonomic failure; *Peri*, the periphery of the OB; *PD*, Parkinson's disease; *PDD*, Parkinson's disease with dementia; *Pneu*, pneumonia; *PSP*, progressive supranuclear palsy; *RA*, rheumatoid arthritis; *RF*, respiratory failure; *S*, lumbar spinal cord; *SAH*, subarachnoid hemorrhage; *SCA*, spinocerebellar ataxia; *SDH*, subdural hemorrhage; *SN*, substantia nigra; *SP*, Braak senile plaque stage; *SY*, sympathetic ganglia; *T*, temporal lobe; *Thal*, Thal senile plaque phase; *TrE*, transentorhinal cortex; *UP*, unknown primary.

**Supplementary Figure 1** Immunohistochemistry using four different anti- $\alpha$ -synuclein antibodies

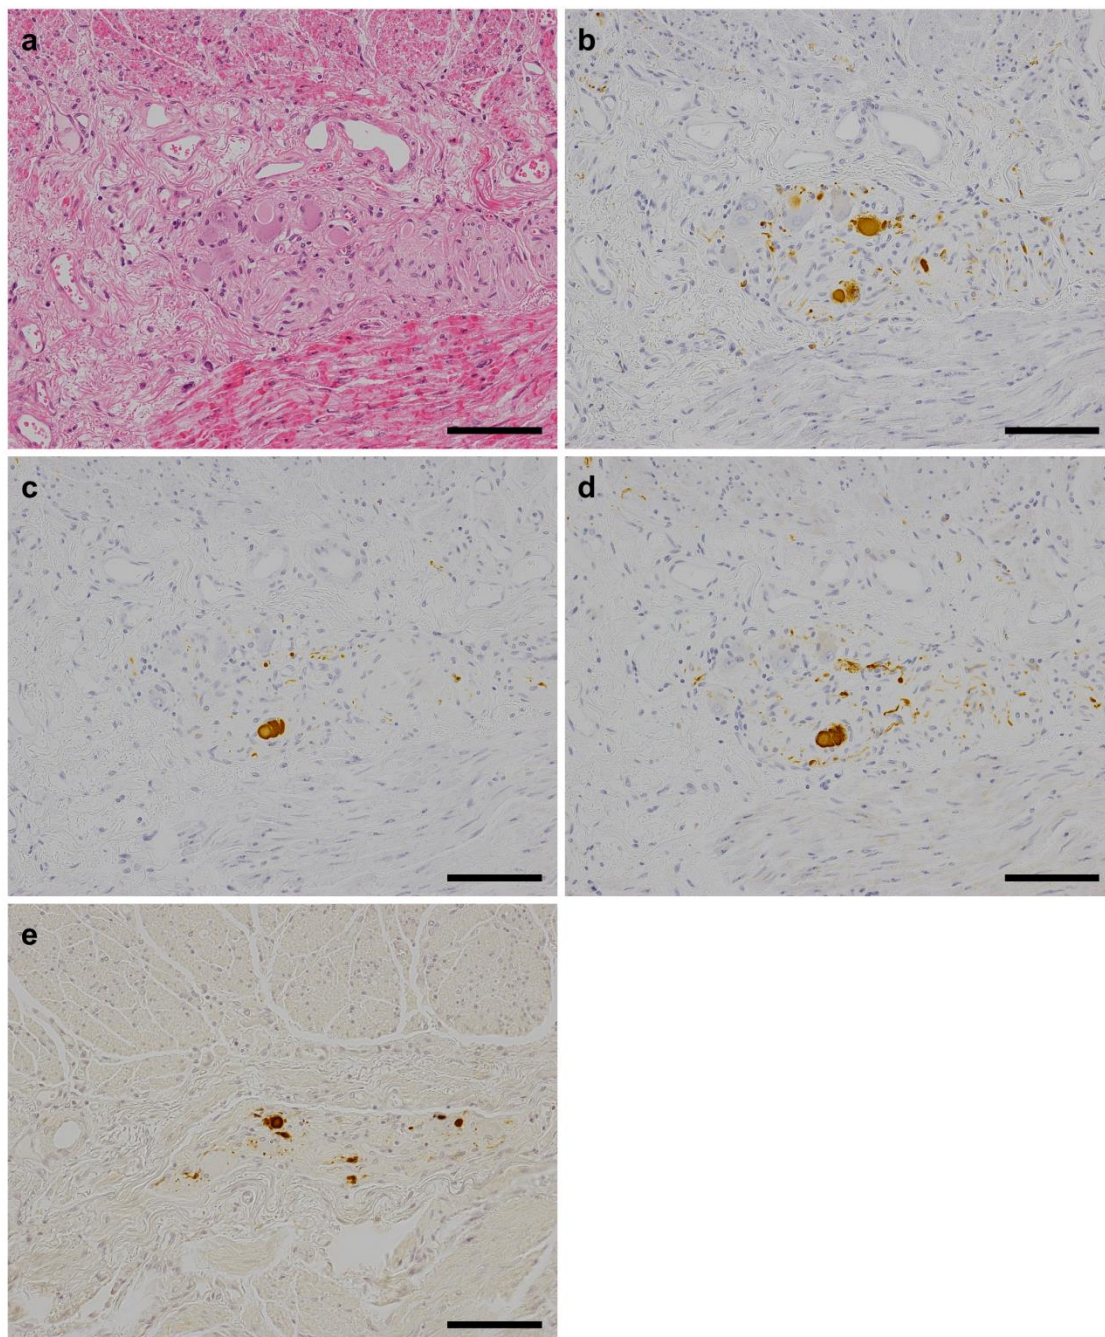

**Supplementary Figure 2** Cause of death for the 518 BBAR cases at autopsy

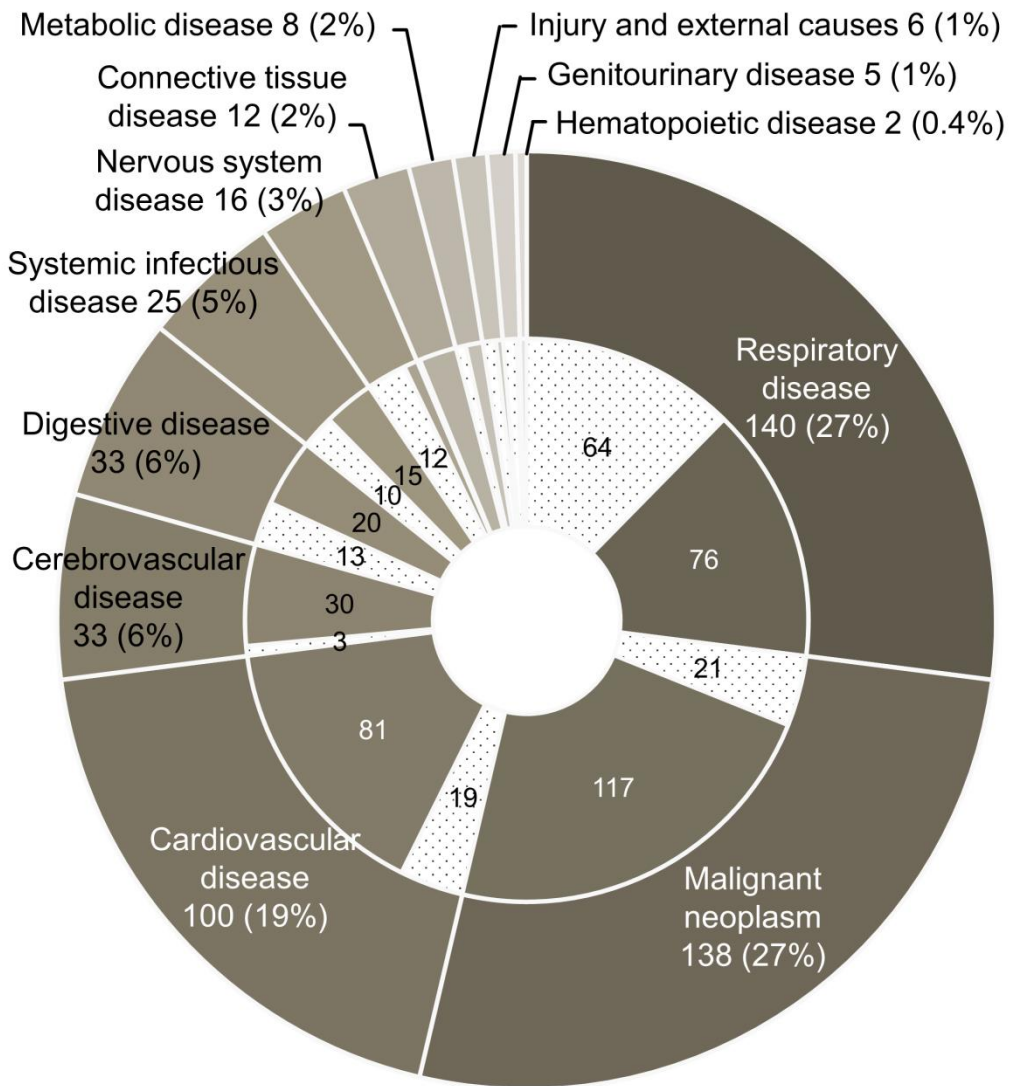



**Supplementary Table 1** Cause of death for the 518 BBAR cases at autopsy

|                                | Number of the cases (%) |               | With neurodegenerative disorder |               | Without neurodegenerative disorder |               |
|--------------------------------|-------------------------|---------------|---------------------------------|---------------|------------------------------------|---------------|
| <b>Respiratory disease</b>     | <b>140</b>              | <b>(27.0)</b> | <b>64</b>                       | <b>(12.4)</b> | <b>76</b>                          | <b>(14.7)</b> |
| Pneumonia                      | 96                      | (18.5)        | 46                              | (8.9)         | 50                                 | (9.7)         |
| Organizing pneumonia           | 20                      | (3.9)         | 13                              | (2.5)         | 7                                  | (1.4)         |
| Interstitial pneumonia         | 11                      | (2.1)         | 1                               | (0.2)         | 10                                 | (1.9)         |
| Diffuse alveolar damage        | 6                       | (1.2)         | 2                               | (0.4)         | 4                                  | (0.8)         |
| Emphysema                      | 5                       | (1.0)         | 1                               | (0.2)         | 4                                  | (0.8)         |
| Pulmonary edema                | 1                       | (0.2)         | 1                               | (0.2)         | 0                                  | (0)           |
| Pneumoconiosis                 | 1                       | (0.2)         | 0                               | (0)           | 1                                  | (0.2)         |
| <b>Malignant neoplasm</b>      | <b>138</b>              | <b>(26.6)</b> | <b>21</b>                       | <b>(4.1)</b>  | <b>117</b>                         | <b>(22.6)</b> |
| Lung                           | 32                      | (6.2)         | 8                               | (1.5)         | 24                                 | (4.6)         |
| Leukemia                       | 15                      | (2.9)         | 0                               | (0)           | 15                                 | (2.9)         |
| Lymphoma                       | 14                      | (2.7)         | 0                               | (0)           | 14                                 | (2.7)         |
| Stomach                        | 14                      | (2.7)         | 3                               | (0.6)         | 11                                 | (2.1)         |
| Large intestine                | 11                      | (2.1)         | 4                               | (0.8)         | 7                                  | (1.4)         |
| Brain                          | 10                      | (1.9)         | 0                               | (0)           | 10                                 | (1.9)         |
| Pancreas                       | 7                       | (1.4)         | 1                               | (0.2)         | 6                                  | (1.2)         |
| Prostate gland                 | 5                       | (1.0)         | 1                               | (0.2)         | 4                                  | (0.8)         |
| Gallbladder                    | 4                       | (0.8)         | 1                               | (0.2)         | 3                                  | (0.6)         |
| Urinary bladder                | 4                       | (0.8)         | 1                               | (0.2)         | 3                                  | (0.6)         |
| Others                         | 18                      | (3.5)         | 2                               | (0.4)         | 16                                 | (3.1)         |
| <b>Cardiovascular disease</b>  | <b>100</b>              | <b>(19.3)</b> | <b>18</b>                       | <b>(3.5)</b>  | <b>82</b>                          | <b>(15.8)</b> |
| Acute myocardial infarction    | 31                      | (6.0)         | 7                               | (1.4)         | 24                                 | (4.6)         |
| Acute aortic dissection        | 14                      | (2.7)         | 2                               | (0.4)         | 12                                 | (2.3)         |
| Aortic aneurysm                | 10                      | (1.9)         | 2                               | (0.4)         | 8                                  | (1.5)         |
| Aortic valve stenosis          | 8                       | (1.5)         | 1                               | (0.2)         | 7                                  | (1.4)         |
| Chronic myocardial infarction  | 8                       | (1.5)         | 1                               | (0.2)         | 7                                  | (1.4)         |
| Pulmonary embolism             | 5                       | (1.0)         | 1                               | (0.2)         | 4                                  | (0.8)         |
| Dilated cardiomyopathy         | 4                       | (0.8)         | 1                               | (0.2)         | 3                                  | (0.6)         |
| Infective endocarditis         | 4                       | (0.8)         | 0                               | (0)           | 4                                  | (0.8)         |
| Others                         | 16                      | (3.1)         | 3                               | (0.6)         | 13                                 | (2.5)         |
| <b>Cerebrovascular disease</b> | <b>33</b>               | <b>(6.4)</b>  | <b>3</b>                        | <b>(0.6)</b>  | <b>30</b>                          | <b>(5.8)</b>  |
| Infarction                     | 19                      | (3.7)         | 1                               | (0.2)         | 18                                 | (3.5)         |



|                                       |            |              |                   |              |                   |              |
|---------------------------------------|------------|--------------|-------------------|--------------|-------------------|--------------|
| Hemorrhage                            | 9          | (1.7)        | 1                 | (0.2)        | 8                 | (1.5)        |
| Subarachnoid hemorrhage               | 4          | (0.8)        | 1                 | (0.2)        | 3                 | (0.6)        |
| Subdural hemorrhage                   | 1          | (0.2)        | 0                 | (0)          | 1                 | (0.2)        |
| <b>Digestive disease</b>              | <b>33</b>  | <b>(6.4)</b> | <b>13</b>         | <b>(2.5)</b> | <b>20</b>         | <b>(3.9)</b> |
| Ischemic enteritis                    | 8          | (1.5)        | 4                 | (0.8)        | 4                 | (0.8)        |
| Intestinal perforation                | 5          | (1.0)        | 5                 | (1.0)        | 0                 | (0)          |
| Duodenal ulcer                        | 4          | (0.8)        | 0                 | (0)          | 4                 | (0.8)        |
| Liver cirrhosis                       | 3          | (0.6)        | 0                 | (0)          | 3                 | (0.6)        |
| Others                                | 13         | (2.5)        | 4                 | (0.8)        | 9                 | (1.7)        |
| <b>Systemic infectious disease</b>    | <b>25</b>  | <b>(4.8)</b> | <b>10</b>         | <b>(1.9)</b> | <b>15</b>         | <b>(2.9)</b> |
| Sepsis                                | 13         | (2.5)        | 3                 | (0.6)        | 10                | (1.9)        |
| Tuberculosis                          | 6          | (1.2)        | 5                 | (1.0)        | 1                 | (0.2)        |
| Nontuberculous mycobacteria infection | 2          | (0.4)        | 0                 | (0)          | 2                 | (0.4)        |
| Others                                | 4          | (0.8)        | 2                 | (0.4)        | 2                 | (0.4)        |
| <b>Nervous system disease</b>         | <b>16</b>  | <b>(3.1)</b> | <b>12</b>         | <b>(2.3)</b> | <b>4</b>          | <b>(0.8)</b> |
| Amyotrophic lateral sclerosis         | 7          | (1.4)        | 7                 | (1.4)        | 0                 | (0)          |
| Frontotemporal lobar degeneration     | 2          | (0.4)        | 2                 | (0.4)        | 0                 | (0)          |
| Others                                | 7          | (1.4)        | 3                 | (0.6)        | 4                 | (0.8)        |
| <b>Connective tissue disease</b>      | <b>12</b>  | <b>(2.3)</b> | <b>1</b>          | <b>(0.2)</b> | <b>11</b>         | <b>(2.1)</b> |
| Rheumatoid arthritis                  | 4          | (0.8)        | 1                 | (0.2)        | 3                 | (0.6)        |
| Spondylodiscitis                      | 3          | (0.6)        | 0                 | (0)          | 3                 | (0.6)        |
| Others                                | 5          | (1.0)        | 0                 | (0)          | 5                 | (1.0)        |
| <b>Metabolic disease</b>              | <b>8</b>   | <b>(1.5)</b> | <b>3</b>          | <b>(0.6)</b> | <b>5</b>          | <b>(1.0)</b> |
| Senile systemic amyloidosis           | 4          | (0.8)        | 3                 | (0.6)        | 1                 | (0.2)        |
| Amyloid light-chain amyloidosis       | 3          | (0.6)        | 0                 | (0)          | 3                 | (0.6)        |
| Pellagra                              | 1          | (0.2)        | 0                 | (0)          | 1                 | (0.2)        |
| <b>Injury and external causes</b>     | <b>6</b>   | <b>(1.2)</b> | <b>4</b>          | <b>(0.8)</b> | <b>2</b>          | <b>(0.4)</b> |
| Tracheobronchial foreign body         | 5          | (1.0)        | 4                 | (0.8)        | 1                 | (0.2)        |
| Ruptured spleen                       | 1          | (0.2)        | 0                 | (0)          | 1                 | (0.2)        |
| <b>Genitourinary disease</b>          | <b>5</b>   | <b>(1.0)</b> | <b>4</b>          | <b>(0.8)</b> | <b>1</b>          | <b>(0.2)</b> |
| Chronic kidney disease                | 3          | (0.6)        | 2                 | (0.4)        | 1                 | (0.2)        |
| Pyelonephritis                        | 2          | (0.4)        | 0                 | (0)          | 2                 | (0.4)        |
| <b>Hematopoietic disease</b>          | <b>2</b>   | <b>(0.4)</b> | <b>0</b>          | <b>(0)</b>   | <b>2</b>          | <b>(0.4)</b> |
| <b>Total</b>                          | <b>518</b> | <b>(100)</b> | <b>153 (29.5)</b> |              | <b>365 (70.5)</b> |              |

*BBAR*, the Brain Bank for Aging Research.

**Supplementary Table 2** Incidence of Lewy pathology in the PNS

| BBAR<br>LB stage | Number of cases<br>(Mean Age at death) | Esophagus<br><i>n</i> (%) | Sympathetic<br>ganglia<br><i>n</i> (%) | Heart<br><i>n</i> (%) | Adrenal<br>gland<br><i>n</i> (%) | Skin<br><i>n</i> (%) |
|------------------|----------------------------------------|---------------------------|----------------------------------------|-----------------------|----------------------------------|----------------------|
| 0.5              | 29 (81.2, SD 9.6)                      | 1 (3.4)                   | 9 (31.0)                               | 3 (10.3)              | 1 (3.4)                          | 1 (3.4)              |
| 1                | 83 (82.9, SD 10.1)                     | 23 (27.7)                 | 51 (61.4)                              | 38 (45.8)             | 19 (22.9)                        | 8 (9.6)              |
| 2                | 20 (83.8, SD 9.5)                      | 13 (65.0)                 | 19 (95.0)                              | 15 (75.0)             | 10 (50.0)                        | 7 (35.0)             |
| 3                | 8 (84.0, SD 6.8)                       | 6 (75.0)                  | 8 (100)                                | 6 (75.0)              | 6 (75.0)                         | 2 (25.0)             |
| 4                | 19 (85.2, SD 8.2)                      | 17 (89.5)                 | 19 (100)                               | 18 (94.7)             | 12 (63.2)                        | 9 (47.4)             |
| 5                | 19 (86.9, SD 7.6)                      | 18 (94.7)                 | 19 (100)                               | 16 (84.2)             | 11 (57.9)                        | 5 (26.3)             |
| Total            | 178                                    | 78 (43.8)                 | 125 (70.2)                             | 98 (55.1)             | 60 (33.7)                        | 32 (18.0)            |

*BBAR*, the Brain Bank for Aging Research; *LB*, Lewy body; *SD*, standard deviation.

**Supplementary Table 3** Summary of 9 cases with PNS-only Lewy pathology

| Age | Gen<br>der | AF | PA | NPD         | BW   | NFT | SP | BB       |          | Lewy pathology* |    |     |     |     |          |   |   |   |    |          |     |    |     |    |   |
|-----|------------|----|----|-------------|------|-----|----|----------|----------|-----------------|----|-----|-----|-----|----------|---|---|---|----|----------|-----|----|-----|----|---|
|     |            |    |    |             |      |     |    | AR<br>LB | DM<br>NV | LC              | SN | nbM | Amy | TrE | Ci<br>ng | T | F | P | OB | Sk<br>in | Adr | He | Eso | SY |   |
| 74  | M          | 0  | 0  | CVD         | 1318 | 1   | 1  | 0.5      | 0        | 0               | 0  | 0   | 0   | 0   | 0        | 0 | 0 | 0 | 0  | 0        | 0   | 0  | 0   | 0  | 1 |
| 85  | F          | 0  | 0  | CVD         | 1183 | 2   | 1  | 0.5      | 0        | 0               | 0  | 0   | 0   | 0   | 0        | 0 | 0 | 0 | 0  | 0        | 0   | 0  | 0   | 0  | 1 |
| 96  | F          | 0  | 0  | NFTD<br>CVD | 1032 | 3   | 1  | 0.5      | 0        | 0               | 0  | 0   | 0   | 0   | 0        | 0 | 0 | 0 | 0  | 0        | 0   | 0  | 0   | 0  | 1 |
| 49  | M          | 0  | 0  | CVD         | 1466 | 1   | 0  | 1        | 0        | 0               | 0  | 0   | 0   | 0   | 0        | 0 | 0 | 0 | 0  | 0        | 0   | 0  | 0   | 0  | 3 |
| 71  | M          | 0  | 0  | Pr LBD      | 1507 | 1   | 1  | 1        | 0        | 0               | 0  | 0   | 0   | 0   | 0        | 0 | 0 | 0 | 0  | 0        | 0   | 0  | 2   | 0  | 0 |
| 77  | F          | 0  | 0  | Pr LBD      | 1252 | 2   | 0  | 1        | 0        | 0               | 0  | 0   | 0   | 0   | 0        | 0 | 0 | 0 | 0  | 0        | 0   | 0  | 1   | 0  | 3 |
| 83  | F          | 0  | 0  | AGD         | 1123 | 3   | 1  | 1        | 0        | 0               | 0  | 0   | 0   | 0   | 0        | 0 | 0 | 0 | 0  | 0        | 0   | 0  | 2   | 0  | 1 |
| 89  | M          | 0  | 0  | Cont        | 1122 | 2   | 2  | 1        | 0        | 0               | 0  | 0   | 0   | 0   | 0        | 0 | 0 | 0 | 0  | 0        | 0   | 0  | 2   | 0  | 2 |
| 93  | M          | 1† | 0  | SDH         | 1122 | 3   | 3  | 1        | 0        | 0               | 0  | 0   | 0   | 0   | 0        | 0 | 0 | 0 | 0  | 0        | 0   | 0  | 0   | 0  | 2 |

*Adr*, adrenal gland; *AF*, autonomic failure. 1 = presence, 0 = absence; *AGD*, argyrophilic grain disease; *Amy*, amygdala; *BBAR LB*, Lewy body stage of the Brain Bank for Aging Research; *BW*, brain weight (g); *Cont*, contusion; *CVD*, cerebrovascular disease; *DLB*, dementia with Lewy bodies; *DMNV*, dorsal motor nucleus of the vagus; *Eso*, esophagus; *F*, frontal lobe; *He*, heart; *LBD*, Lewy body disease; *LC*, locus coeruleus; *M*, medullar oblongata; *nbM*, nucleus basalis of Meynert; *NFT*, Braak neurofibrillary tangle stage; *NFTD*, neurofibrillary tangle predominant dementia; *NPD*, neuropathological diagnosis; *OB*, olfactory bulb; *P*, parietal lobe; *PA*, Parkinsonism. 1 = presence, 0 = absence; *Pr LBD*, preclinical LBD; *SDH*, subdural hemorrhage; *SN*, substantia nigra; *SP*, Braak senile plaque stage; *SY*, sympathetic ganglia; *T*, temporal lobe; *TrE*, transentorhinal cortex.

\*Semi-quantitative analyses of the  $\alpha$ -synuclein deposition (score 0–4 according to DLB Consensus guidelines).

†Constipation.

**Supplementary Table 4** Summary of the literature on Lewy pathology in the ENS\*

| Author         | Year | Region                                                         | Number<br>of<br>subjects | Positivity of Lewy pathology |             |     |                                                              |                                 |
|----------------|------|----------------------------------------------------------------|--------------------------|------------------------------|-------------|-----|--------------------------------------------------------------|---------------------------------|
|                |      |                                                                |                          | PD                           | DLB         | PAF | Preclinical/<br>Prodromal LBD                                | Control                         |
| <b>Autopsy</b> |      |                                                                |                          |                              |             |     |                                                              |                                 |
| Tanei Z        | 2020 | L-Eso                                                          | 518                      | 6/8 (75%)                    | 35/38 (92%) | 1/1 | Earliest LBD:<br>1/29 (3%)<br>Prec/Prod LBD:<br>35/102 (34%) | 0/340 (0%)                      |
| Beach TG       | 2016 | S-Col                                                          | 10                       | 5/5 (100%)                   |             |     |                                                              | 0/5 (0%)                        |
| Gelpi E        | 2014 | L-Eso, Sto<br>Ile, T/D-Col<br>Rec                              | 28                       | 8/10 (80%)                   | 5/5 (100%)  |     |                                                              | 1/13 (8%)                       |
| Mu L           | 2013 | Pharynx                                                        | 14                       | 10/10 (100%)                 |             |     |                                                              | 0/4 (0%)                        |
| Gold A         | 2013 | Col                                                            | 95                       | 10/10 (100%)                 |             |     |                                                              | Gen 40/77 (52%)<br>AD 3/8 (38%) |
| Annerino DM    | 2012 | Sto, Duo, Ile,<br>T-Col, Rec                                   | 29                       | 13/13 (100%)                 |             |     | 2/4 (50%)                                                    | 0/12 (0%)                       |
| Del Tredici K  | 2011 | L-Eso, Sto                                                     | 4                        | 3/3 (100%)                   |             |     | 1/1 (100%)                                                   |                                 |
| Beach TG       | 2010 | U/L-Eso, Sto<br>Duo, Jej, Ile<br>Rec, T/S-Col<br>Liv, Pan, Gal | 92                       | 11/17 (65%)                  | 5/9 (56%)   |     | 1/7 (14%)                                                    |                                 |

|                |      |               |     |                      |                |                |
|----------------|------|---------------|-----|----------------------|----------------|----------------|
| Braak H        | 2006 | L-Eso, Sto    | 10  | 3/3 (100%)           | 2/2 (100%)     | 0/5 (0%)       |
| Bloch A        | 2006 | L-Eso         | 98  | 1/2 (50%)            | 14/17 (82%)    |                |
| Wakabayashi K† | 1988 | U/M/L-Eso     | 31  | Eso 8/8 (100%)       | Eso 8/24 (33%) |                |
|                |      | Sto, Duo      |     | Sto 2/8 (25%)        | Sto 0/24 (0%)  |                |
|                |      | Jej, Ile      |     | Duo 1/7 (14%)        | Duo 3/24 (13%) |                |
|                |      | A/T/D-Col     |     | Jej 2/8 (25%)        | Jej 1/24 (4%)  |                |
|                |      | Rec           |     | Ile 0/8 (0%)         | Ile 1/24 (4%)  |                |
|                |      |               |     | Col 3/8 (38%)        | Col 0/24 (0%)  |                |
|                |      |               |     | Rec 2/7 (29%)        | Rec 0/24 (0%)  |                |
| Qualman SJ†    | 1984 | L-Eso, Sto    | 80  | 2/22 (9%)            |                | 0/50 (0%)      |
|                |      | Jej, Ile, Col |     |                      |                |                |
|                |      | Rec           |     |                      |                |                |
| <b>Surgery</b> |      |               |     |                      |                |                |
| Yan, F.        | 2018 | Sto, Col      | 63  | Sto 6/10 (60%)       |                | Sto 1/11 (9%)  |
|                |      | Rec, App      |     | Col 5/9 (56%)        |                | Col 2/9 (22%)  |
|                |      |               |     | Rec 5/9 (56%)        |                | Rec 2/8 (25%)  |
|                |      |               |     | App 1/3 (33%)        |                | App 2/8 (25%)  |
| Shin C‡        | 2017 | Sto           | 66  | Sto 7/12 (58%)       |                |                |
|                |      | A/T/D-Col     |     | A/T-Col 3/9 (33%)    |                |                |
|                |      | Rec           |     | D-Col/Rec 2/12 (17%) |                |                |
| Kim JS         | 2017 | Col           | 12  |                      |                | 10/12 (83%)    |
| Stokholm MG‡   | 2016 | Eso, Sto      | 147 | Eso 4/7 (57%)        | Eso 2/16 (13%) | Eso 2/23 (9%)  |
|                |      | SmI, App      |     | Sto 4/10 (40%)       | Sto 9/21 (43%) | Sto 5/31 (16%) |

|                          |              | Col                  |     | SmI 1/1 (100%)<br>App 2/3 (67%)<br>Col 3/5 (60%)      |     | SmI 6/7 (86%)<br>App 5/5 (100%)<br>Col 4/8 (50%) | SmI 3/8 (38%)<br>App 6/8 (75%)<br>Col 5/13 (38%)        |
|--------------------------|--------------|----------------------|-----|-------------------------------------------------------|-----|--------------------------------------------------|---------------------------------------------------------|
| Aldecoa I                | 2015         | Sto, SmI, Col        | 18  | 4/6 (67%)                                             |     |                                                  | 1/12 (8%)                                               |
| Kurashiki-Osaka T        | 2014         | Sto                  | 1   |                                                       | 1/1 |                                                  |                                                         |
| Masuda H                 | 2014         | T-Col                | 1   |                                                       | 1/1 |                                                  |                                                         |
| Ito S                    | 2014         | Sto, SmI<br>Col, Gal | 8   | 4/6 (67%)                                             |     | 2/2 (100%)                                       |                                                         |
| Sunwoo MK                | 2013         | Sto                  | 32  | 8/32 (25%)                                            |     |                                                  |                                                         |
| Bottner M                | 2012         | Col, Rec             | 13  |                                                       |     |                                                  | 11/13 (85%)                                             |
| Minguez-Castellanos<br>A | 2007         | Sto, SmI<br>LaI      | 77  |                                                       |     |                                                  | 3/77 (4%)                                               |
| <b>Biopsy</b>            |              |                      |     |                                                       |     |                                                  |                                                         |
| Chahine LM               | 2020         | S-Col                | 80  | 8/59 (14%)                                            |     |                                                  | 21/21 (100%)                                            |
| Leclair-Visonneau L      | 2019<br>2017 | S-Col                | 43  | 20/43 (47%)                                           |     |                                                  |                                                         |
| Fenyi A                  | 2019         | S-Col, Rec           | 29  | S-Col 5/10 (50%)<br>Rec 0/4 (0%)                      |     |                                                  | S-Col 0/1 (0%)<br>Rec 0/2 (0%)                          |
| Lee HJ                   | 2018         | Sto, A/T/S-Col       | 77  | 12/35 (34%)                                           |     |                                                  | 20/52 (38%)                                             |
| Barrenschee M            | 2017         | Rec                  | 23  | 3/12 (25%)                                            |     |                                                  | 4/11 (36%)                                              |
| Chung SJ                 | 2016         | Sto<br>A/T/S-Col     | 104 | Sto 4/11 (36%)<br>A-Col 2/25 (8%)<br>T-Col 5/24 (21%) |     |                                                  | Sto 10/19 (53%)<br>A-Col 5/25 (20%)<br>T-Col 8/36 (22%) |

|                 |      |               |     |                   |            |                  |
|-----------------|------|---------------|-----|-------------------|------------|------------------|
|                 |      |               |     | S-Col 0/18 (0%)   |            | S-Col 2/20 (10%) |
| Visanji NP      | 2015 | S-Col, Rec    | 33  | 22/22 (100%)      |            | 9/11 (91%)       |
| Sprenger FS     | 2015 | A/T/D/S-Col   | 50  | 1/19 (5%)         | 4/17 (24%) | 0/14 (0%)        |
| Sanchez-Ferro A | 2015 | Sto           | 57  | 17/28 (61%)       | 1/6 (17%)  | 1/23 (4%)        |
| Hilton D        | 2014 | Eso, Sto, Gal | 223 | 7/62 (11%)        |            | 0/161 (0%)       |
|                 |      | SmI, LaI      |     |                   |            |                  |
| Devos D         | 2013 | A-Col         | 18  | 12/18 (67%)       |            |                  |
| Shannon KM      | 2012 | S-Col         | 55  | 9/9 (100%)        |            | Gen 0/23 (0%)    |
|                 |      |               |     |                   |            | IBD 0/23 (0%)    |
| Shannon KM      | 2012 | Col           | 3   |                   | 3/3 (100%) |                  |
| Pouclet H       | 2012 | A/D-Col       | 35  | A-Col 17/26 (65%) |            | 0/9 (0%)         |
|                 |      | Rec           |     | D-Col 11/26 (42%) |            |                  |
|                 |      |               |     | Rec 6/26 (23%)    |            |                  |
| Pouclet H       | 2012 | D/S-Col       | 19  | 5/9 (56%)         |            | 0/10 (0%)        |
| Lebouvier T     | 2010 | A/D-Col       | 39  | 21/29 (72%)       |            | 0/10 (0%)        |
| Lebouvier T     | 2008 | A-Col         | 10  | 4/5 (80%)         |            | 0/5 (0%)         |

*AD*, Alzheimer's disease; *App*, Appendix; *Col*, colon; *D-col*, Descending colon; *Duo*, Duodenum; *Gal*, Gallbladder; *Gen*, General Population; *IBD*, Inflammatory bowel disease; *Ile*, Ileum; *Jej*, Jejunum; *LaI*, Large intestine; *L-Eso*, Lower esophagus; *Liv*, Liver; *M-Eso*, Middle esophagus; *Pan*, Pancreas; *Prec/Prod*, Preclinical/Prodromal; *Rec*, Rectum; *SmI*, Small intestine; *Sto*, Stomach; *S-Col*, Sigmoid colon; *T-Col*, Transverse colon; *U-Eso*, Upper esophagus.

\*Ref. Wakabayashi K, Wakabayashi K, Miki Y (2018) [Multi-Organ Distribution of Alpha-Synuclein Pathology in Dementia with Lewy Bodies]. *Brain Nerve* 70: 489-500 Doi 10.11477/mf.1416201031

†These studies examined the occurrence of LB before the development of phosphorylated  $\alpha$ -synuclein immunohistochemistry.

‡Surgical and biopsy specimens.
